# Supplementary material for: A genetic variant of the Wnt receptor LRP6 accelerates synapse degeneration during aging and in Alzheimer’s disease
Source: PubMed Central journal article supplement (PMC10624429; doi:10.1126/sciadv.abo7421), 2023-01-13
Supplement: sciadv.abo7421_sm.pdf [file sciadv.abo7421_sm.pdf]

Supplementary Materials for

**A genetic variant of the Wnt receptor LRP6 accelerates synapse degeneration during aging and in Alzheimer's disease**

Megan E. Jones *et al.*

Corresponding author: Patricia C. Salinas, [p.salinas@ucl.ac.uk](mailto:p.salinas@ucl.ac.uk)

*Sci. Adv.* **9**, eabo7421 (2023)  
DOI: 10.1126/sciadv.abo7421

**This PDF file includes:**

Figs. S1 to S12

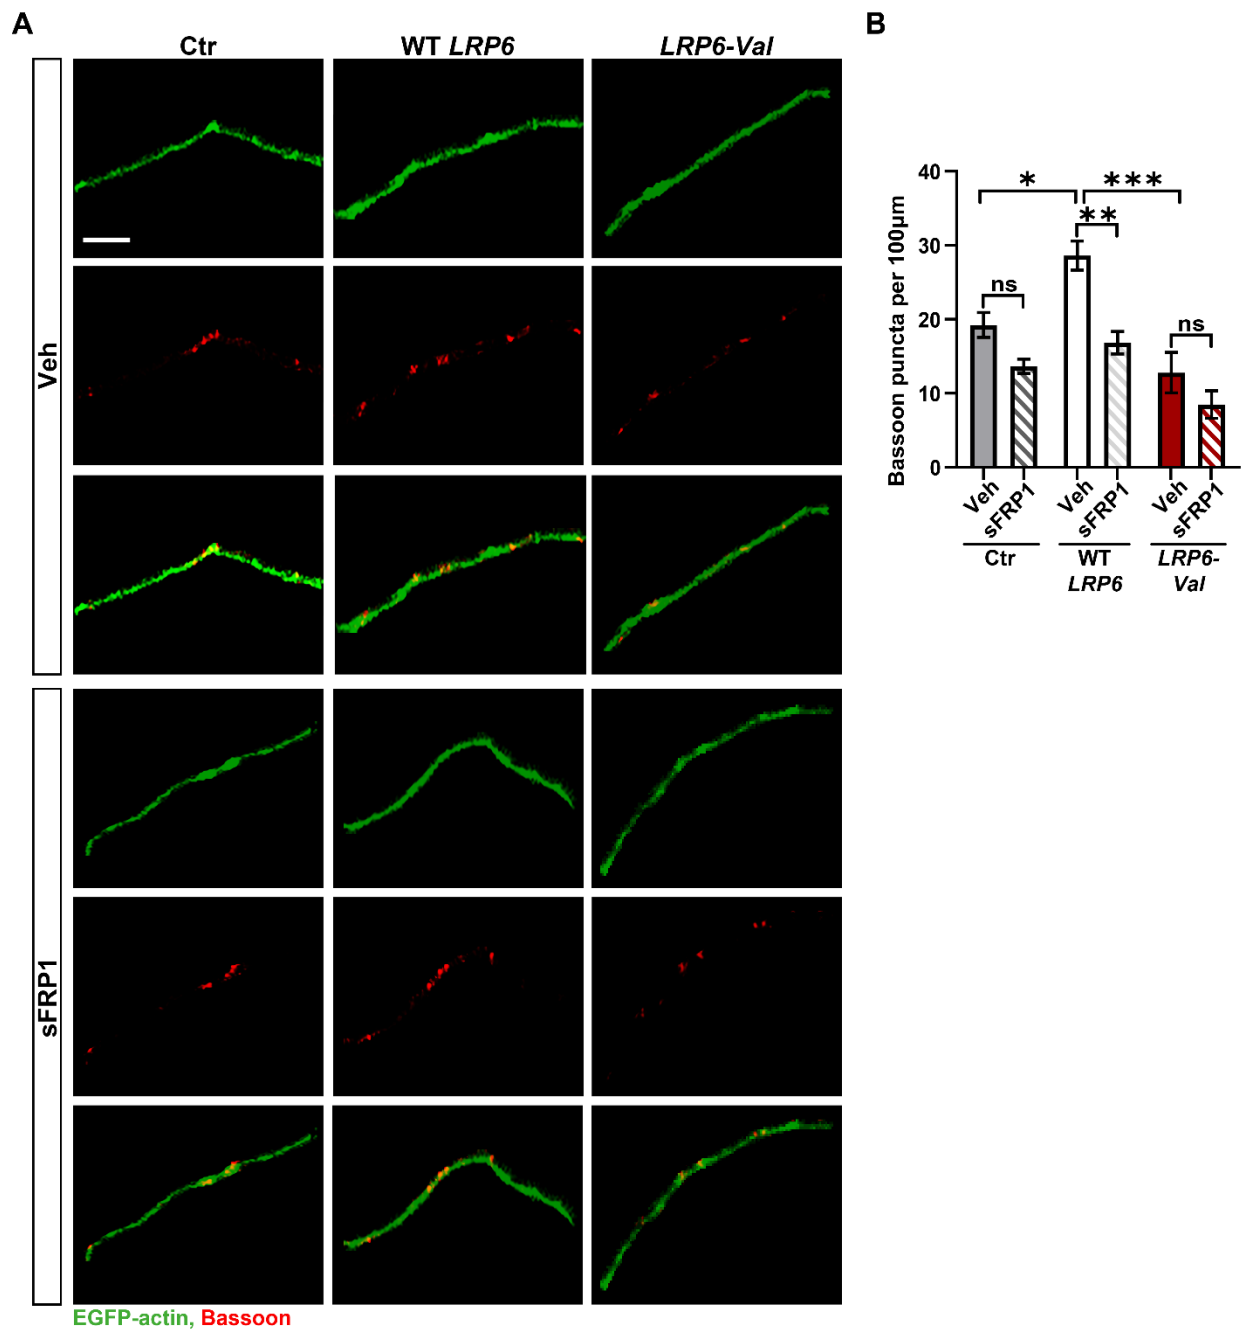

Figure S1

**Figure S1. Inhibition of endogenous Wnts with sFRP1 blocks the effect of WT *LRP6* expression on presynaptic assembly.** **A)** Confocal images of bassoon puncta (red) on isolated axons of neurons expressing EGFP-actin (green) alone, or with EGFP-actin and human WT *LRP6* or *LRP6-Val* exposed to recombinant sFRP1 or a control vehicle (veh). Scale bar = 5  $\mu$ m. **B).** sFRP1 blocked the increase in the number of bassoon puncta in cells expressing WT *LRP6*. sFRP1 had no effect on cells expressing *LRP6-Val*. N = 3 independent cultures, 6-9 axons imaged per culture. Two-way-ANOVA with Tukey's post-hoc test. \*  $p < 0.05$ , \*\*  $p < 0.01$ , \*\*\*  $p < 0.001$ . Data are represented as mean  $\pm$  SEM.

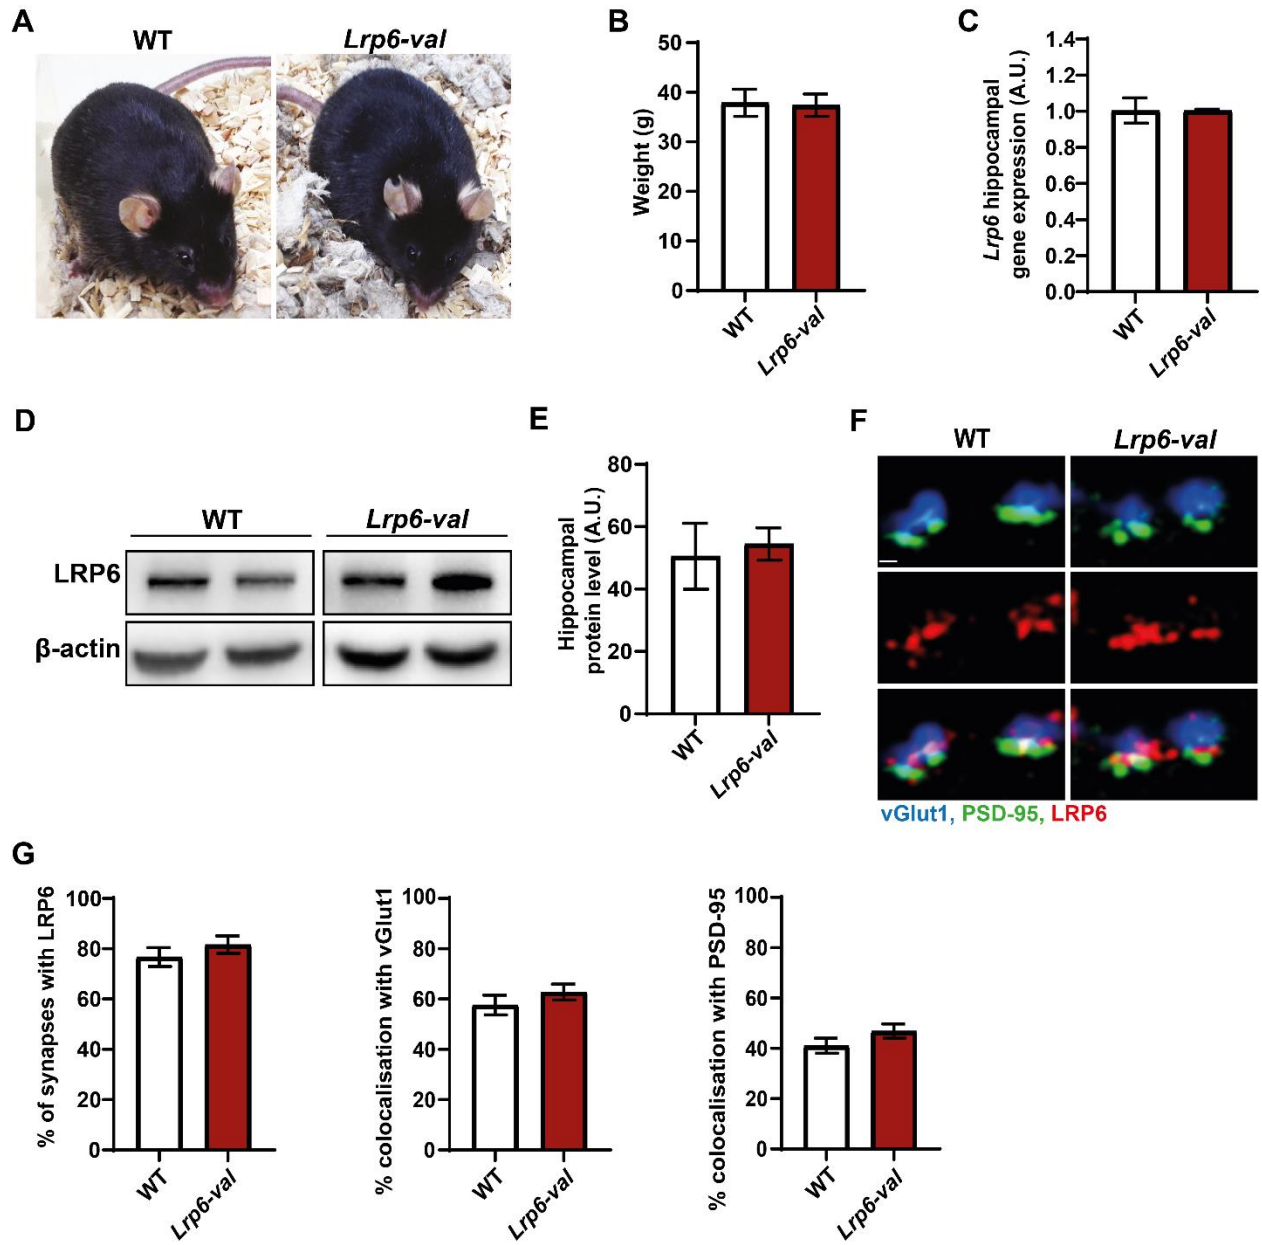

Figure S2

**Figure S2. Characterisation of homozygous *Lrp6-val* knock-in mice.** **A)** Images of WT and *Lrp6-val* mice at 7 months showed that these mice developed normally and have no visible external abnormalities. **B)** Adult *Lrp6-val* mice had the same weights as control WT mice. Weights of male mice were measured at 4-8 months of age. WT N = 9. *Lrp6-val* N = 10. Unpaired T-test. **C)** Quantitative RT-PCR analyses of *Lrp6* mRNA levels in the hippocampus of WT and *Lrp6-val* mice at 3-4 months of age showed no changes in the expression of *Lrp6*. WT N = 5, *Lrp6-val* N = 6. Unpaired T-Test. **D)** Hippocampal LRP6 protein levels in WT and *Lrp6-val* mice at 4 months. **E)** No changes in LRP6 levels (normalised to  $\beta$ -actin) were observed between WT or *Lrp6-val* mice. N = 3 per genotype. Unpaired T-test. **F)** SIM images of excitatory synapses containing LRP6 (red) from WT and *Lrp6-val* hippocampal neurons showing vGlut1 (blue) and PSD-95 (green). Scale bar = 0.2  $\mu$ m. **G)** LRP6 receptor exhibited similar pre- and post-synaptic localisation in WT and *Lrp6-val* mice. 2 independent cultures, 6-8 images per culture. Unpaired T-tests. Data are represented as mean  $\pm$  SEM.

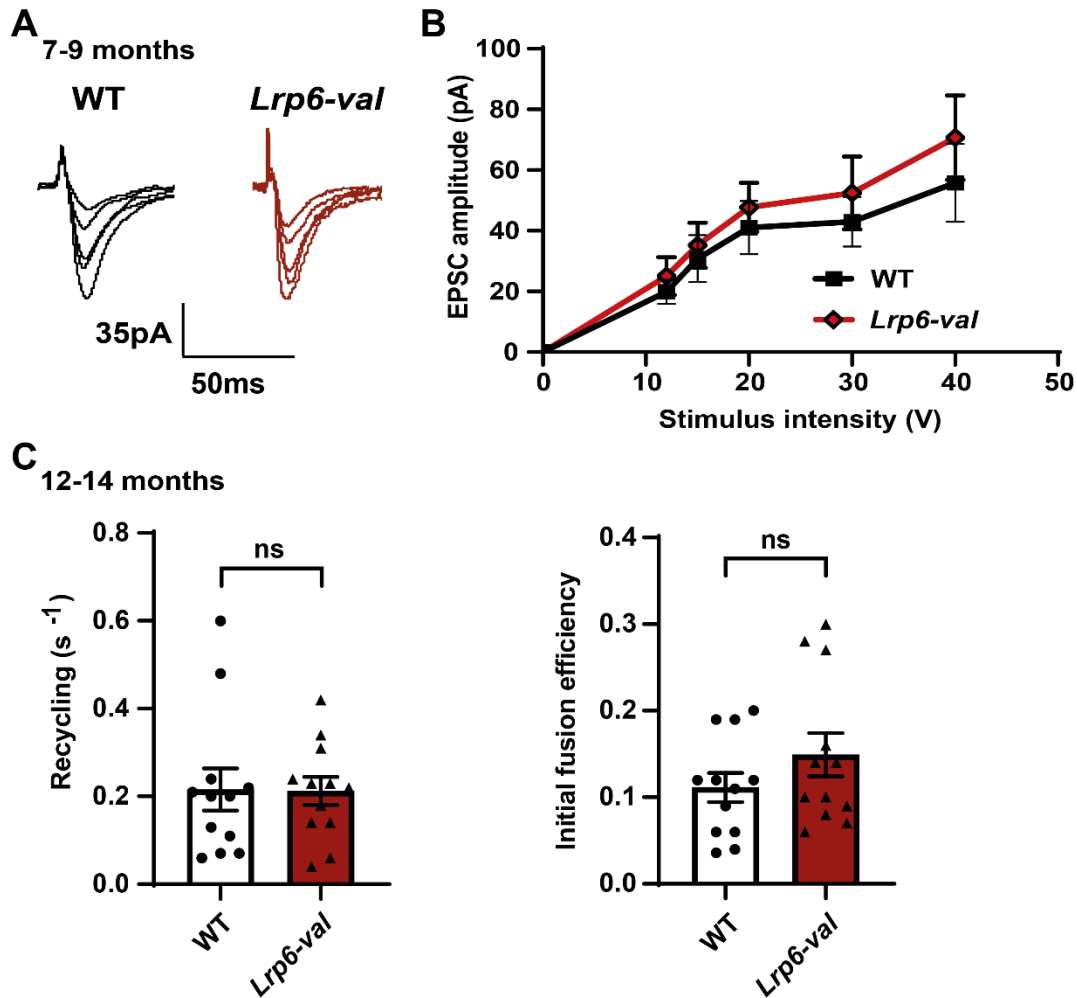

**Figure S3**

**Figure S3. Basal synaptic transmission is unaffected in *Lrp6-val* mice at 7-9 months and vesicle recycling and initial fusion efficiency are unchanged in *Lrp6-val* mice at 12-14 months.**

**A)** Representative traces of post-synaptic currents elicited at different stimulation intensities. **B)** No differences were detected in the input-output curves at 7-9 months.  $N = 12-14$  cells recorded from 4-5 animals per genotype. Repeated-measures one-way-ANOVA. **C)** Graphs display the recycling rate and initial fusion efficiency obtained from all cells. No differences were observed in *Lrp6-val* mice when compared to WT mice at 12-14 months.  $N = 12$  cells from 4 animals per genotype. Unpaired Student's *T*-test. Data are represented as mean  $\pm$  SEM.

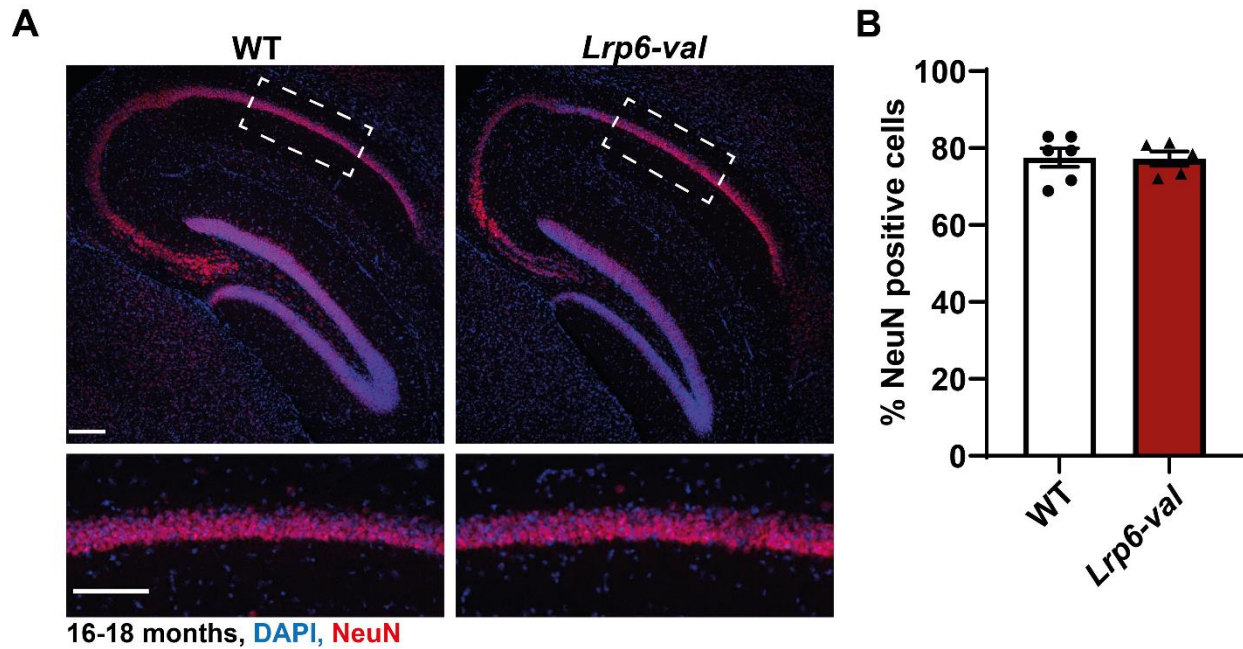

**Figure S4**

**Figure S4. *Lrp6-val* mice do not display neuronal loss at 16-18 months.** A) Confocal images of the hippocampus of WT and *Lrp6-val* mice labelled with DAPI (blue) and NeuN (red). Scale bar = 150  $\mu$ m. Insets show higher magnification images of the CA1 region. Scale bar = 100  $\mu$ m. B) Quantification revealed no differences in the percentage of NeuN positive cells between WT and *Lrp6-val* mice. WT N = 6, *Lrp6-val* N = 5. Unpaired T-test. Data are represented as mean  $\pm$  SEM.

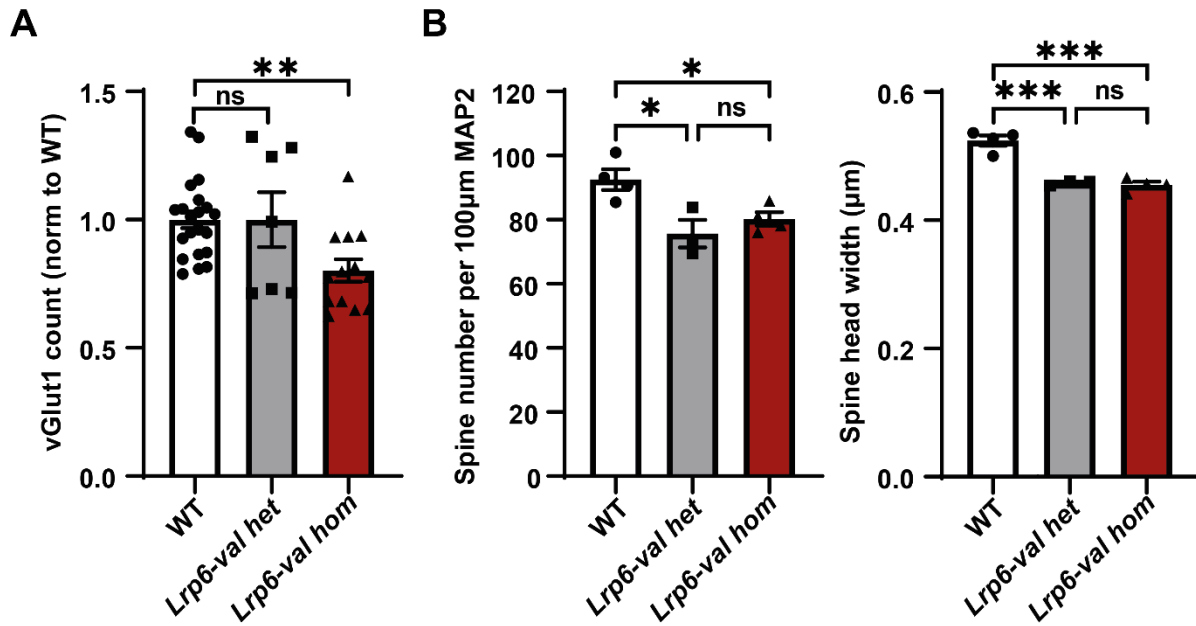

**Figure S5**

**Figure S5. Heterozygous *Lrp6-val* mice display post-synaptic defects at 12-14 months. A)** Quantification of vGlut1 puncta in the CA1 stratum radiatum of WT, *Lrp6-val* het and *Lrp6-val* hom mice at 12-14 months. *Lrp6-val* hom mice exhibited fewer vGlut1 puncta. WT N = 10, *Lrp6-val* het N = 4, *Lrp6-val* hom N = 10, 1-3 slices per brain. One-way-ANOVA with Tukey's post hoc test. **B)** Analyses of dendritic spines in *Lrp6-val* mice crossed to a *Thy1-GFP* reporter line at 12-14 months. Spine number and head width were decreased in both *Lrp6-val* het and *Lrp6-val* hom mice when compared to WT mice. WT N = 4, *Lrp6-val* het N = 3, *Lrp6-val* hom N = 4. One-way-ANOVA with Tukey's post hoc test. \* p < 0.05, \*\* p < 0.01, \*\*\* p < 0.001. Data are represented as mean ± SEM.



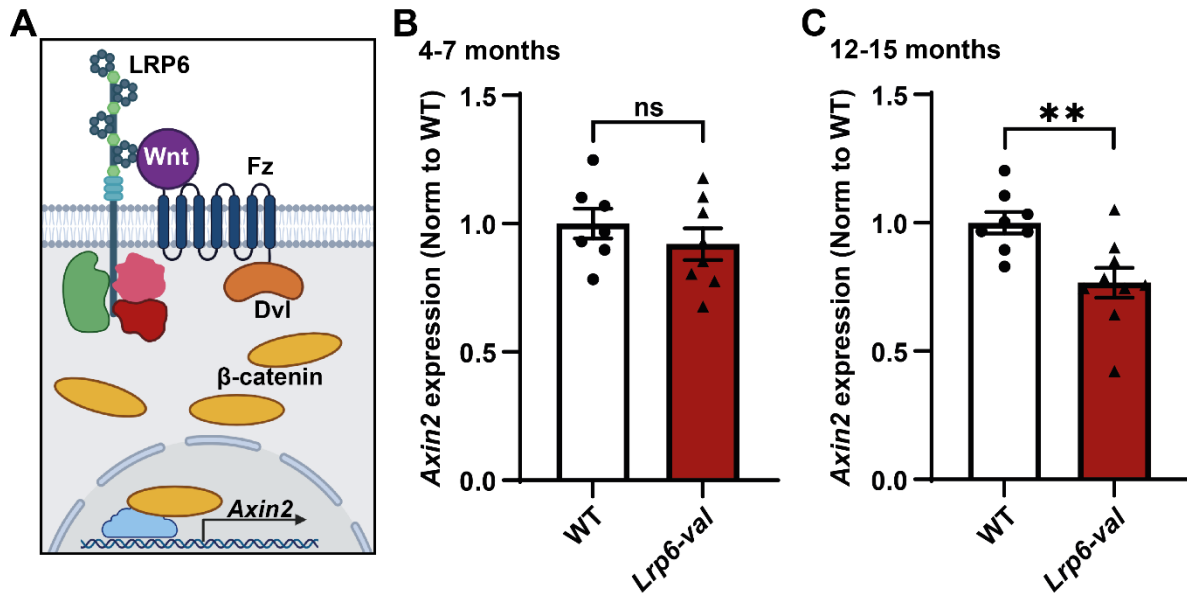

**Figure S6**

**Figure S6. Axin2 mRNA levels are reduced at 12-15 months in *Lrp6-val* mice.** **A)** Schematic of the Wnt signalling pathway showing regulation of *Axin2* expression. **B** and **C)** Quantitative RT-PCR analyses of *Axin2* expression in the hippocampus of WT and *Lrp6-val* mice at 4-7 months (**B**) and 12-15 months (**C**). *Axin2* expression was reduced in *Lrp6-val* mice at 12-15 months but not before. 4-7 months: WT N = 7, *Lrp6-val* N = 8. 12-15 months: WT N = 8, *Lrp6-val* N = 9. Unpaired T-tests. \*\*  $p < 0.01$ . Data are represented as mean  $\pm$  SEM.

**A**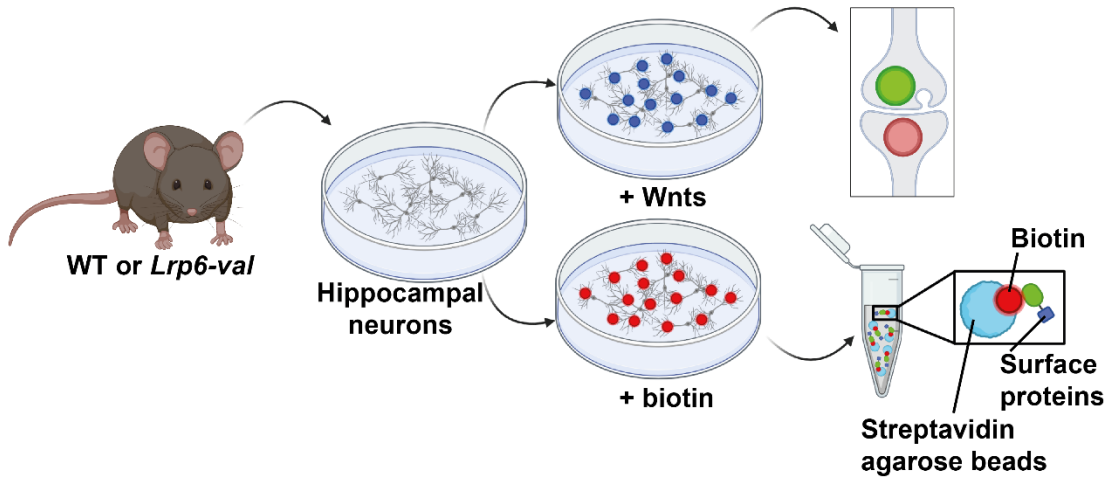**B**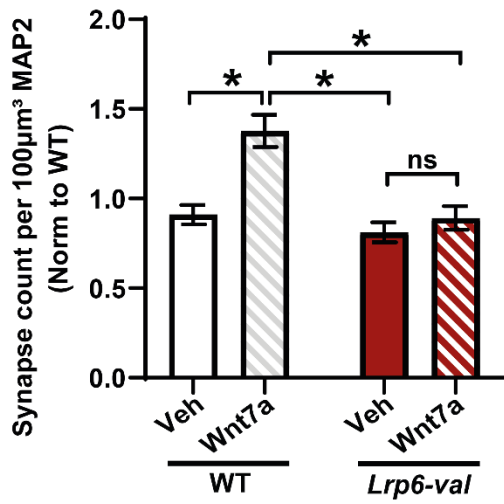**C**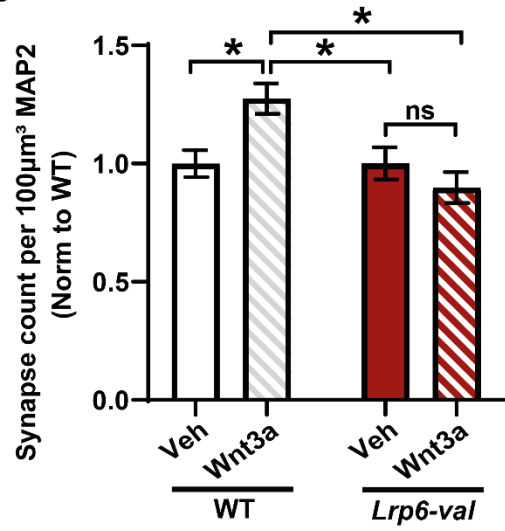**D**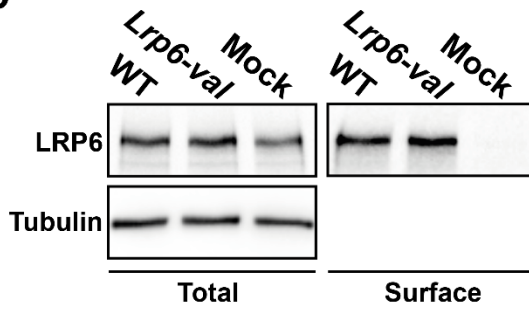**E**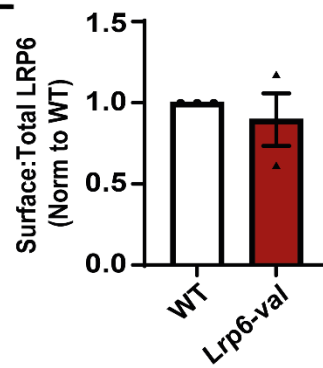**Figure S7**

**Figure S7. *Lrp6-val* neurons do not respond to Wnt7a or Wnt3a to promote synapse formation.** **A)** Diagram showing the isolation of primary neurons from WT and homozygous *Lrp6-val* mice to evaluate synapse number or surface levels of the receptor by surface biotinylation. Top: neurons were exposed to recombinant Wnt7a or Wnt3a for 3 hours prior to analyses of synapses by confocal microscopy. Bottom: neurons were incubated with biotin (red circles). Biotin bound surface proteins (Green and blue shapes) were pulled down with streptavidin-agarose beads (blue circles). **B)** Wnt7a (100ng/ml) increased the number of synapses in WT neurons, but Wnt7a had no effect on *Lrp6-val* neurons. N = 3 independent cultures, 8-11 images per culture. Two-way-ANOVA with Games-Howell post hoc test. \*  $p < 0.05$ . **C)** Wnt3a increased synapse number in WT neurons but *Lrp6-val* neurons failed to respond to Wnt3a. N = 3 independent cultures, 8-10 images per culture. Two-way-ANOVA with Games-Howell post hoc test. \*  $p < 0.05$ . **D)** Surface biotinylation analyses of LRP6 were performed on neurons isolated from WT and homozygous *Lrp6-val* mice. **E)** No differences in the ratio of surface to total LRP6 were observed. N = 3 independent cultures. Mann-Whitney. Data are represented as mean  $\pm$  SEM.

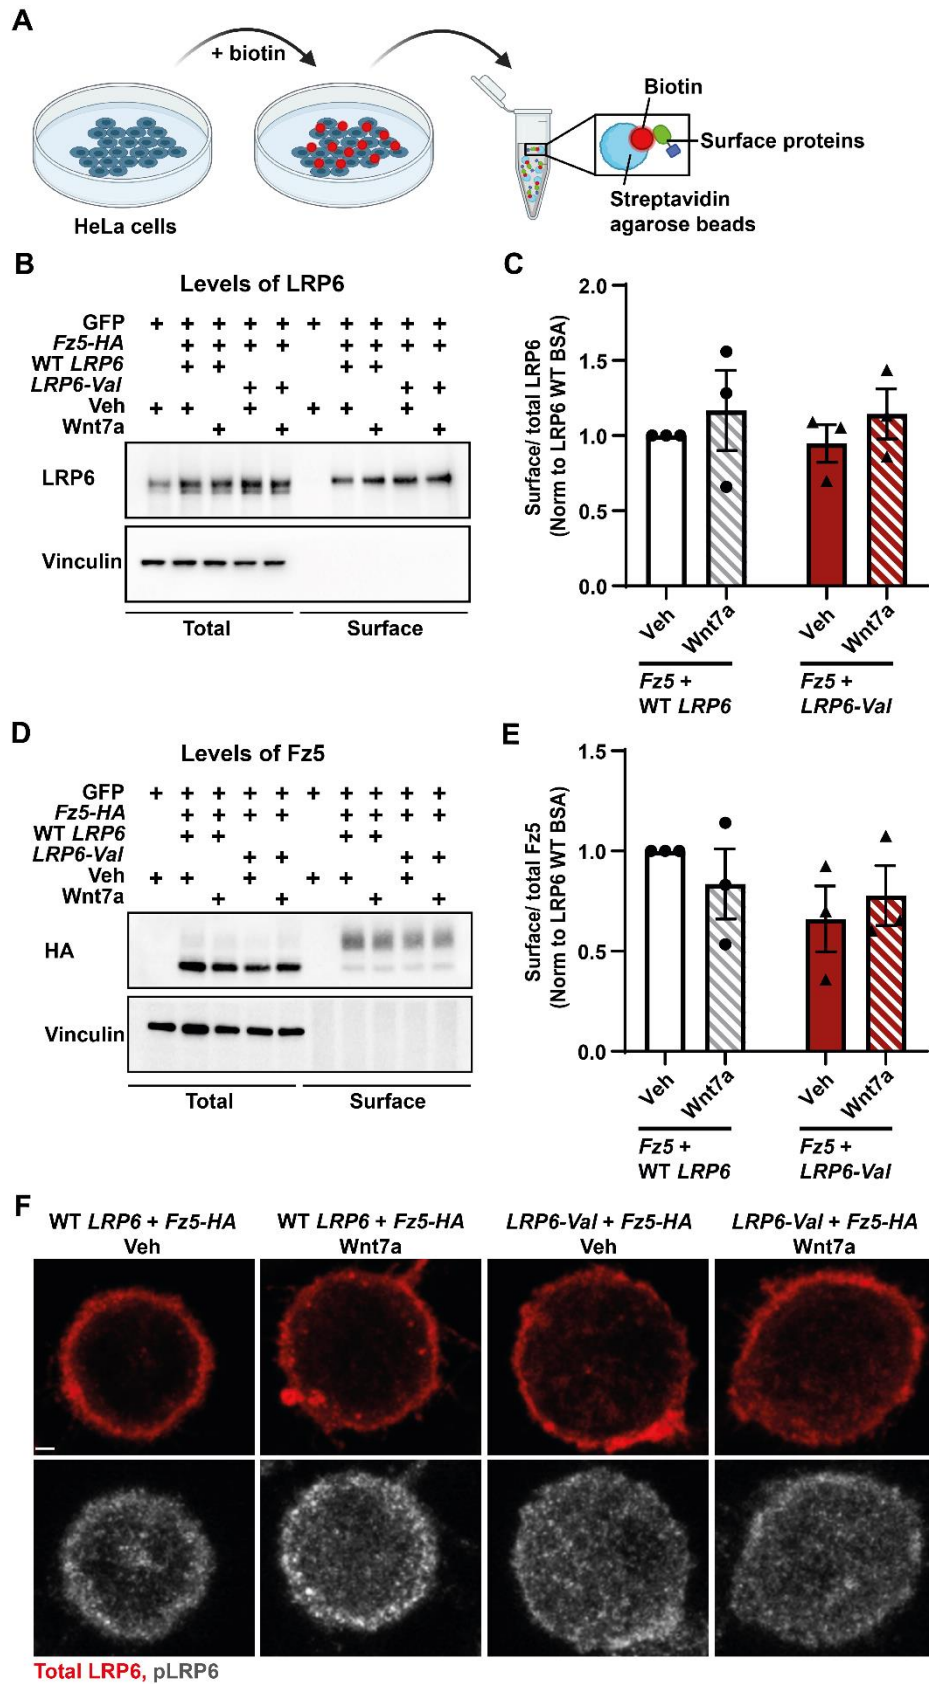

Figure S8

**Figure S8. The surface localisation of LRP6 is not affected in cells expressing *LRP6-Val*.**

**A)** Schematic of surface biotinylation analyses of HeLa cells. **B)** Western blot analyses of LRP6 levels following surface biotinylation of cells expressing *Fz5-HA* and WT *LRP6* or *LRP6-Val* and treated with recombinant Wnt7a. **C)** No differences in the ratio of surface to total LRP6 were observed after Wnt7a treatment. N = 3 independent cultures. Two-way-ANOVA with Games-Howell post hoc test. **D)** Western blot analyses of Fz5-HA following surface biotinylation of HeLa cells expressing *Fz5-HA* and WT *LRP6* or *LRP6-Val* and treated with recombinant Wnt7a. We observed a higher molecular weight of Fz5-HA at the surface, which is probably due to changes in glycosylation of this receptor (59). **E)** The ratio of surface to total Fz5-HA were unchanged after Wnt7a treatment. Both bands observed for HA were quantified. N = 3 independent cultures. Two-way-ANOVA with Games-Howell post hoc test. **F)** Confocal images of HeLa cells expressing GFP, WT *LRP6* and *Fz5-HA* or GFP, *LRP6-Val* and *Fz5-HA*. Total LRP6 (red) and phosphorylated LRP6 (pLRP6) (grey). Scale bar = 2  $\mu$ m. Data are represented as mean  $\pm$  SEM.

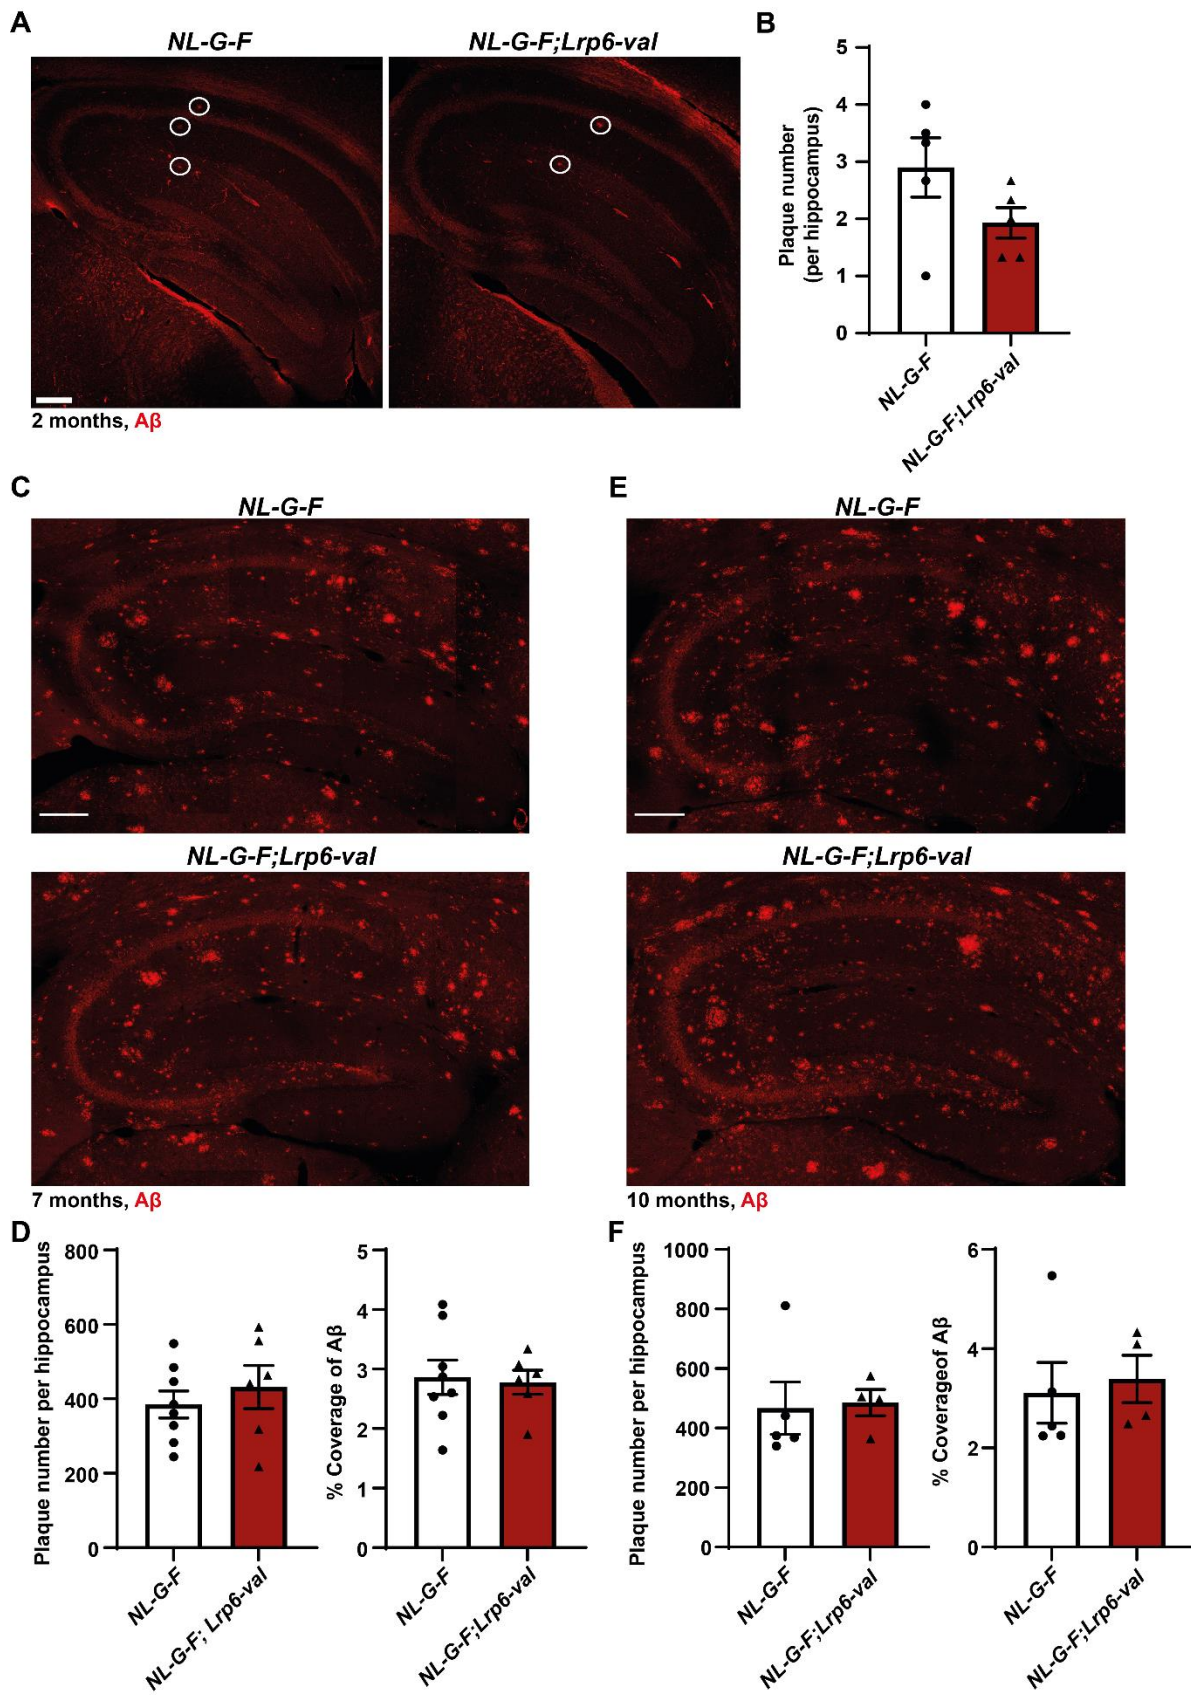

Figure S9

**Figure S9. Plaque load is unaltered in *NL-G-F;Lrp6-val* mice.** **A)** Confocal images of A $\beta$  (red) in the hippocampi of *NL-G-F* and *NL-G-F;Lrp6-val* mice at 2 months. Scale bar = 150  $\mu$ m. **B)** Quantification shows no differences in plaque number were detected. *NL-G-F* N = 5, *NL-G-F;Lrp6-val* N = 5. Unpaired T-test. **C)** A $\beta$  plaques (red) in the hippocampi of *NL-G-F* and *NL-G-F;Lrp6-val* mice at 7 months. Scale bar = 200  $\mu$ m. **D)** No differences in plaque number or A $\beta$  coverage in the hippocampus were observed. *NL-G-F* N = 8, *NL-G-F;Lrp6-val* N = 6. Unpaired T-test. **E)** Images of A $\beta$  (red) in the hippocampi of *NL-G-F* and *NL-G-F;Lrp6-val* mice at 10 months. Scale bar = 200  $\mu$ m. **F)** Quantification revealed no differences in plaque number or A $\beta$  coverage. *NL-G-F*: N = 5, *NL-G-F;Lrp6-val*: N = 4. Mann-Whitney tests. Data are represented as mean  $\pm$  SEM.

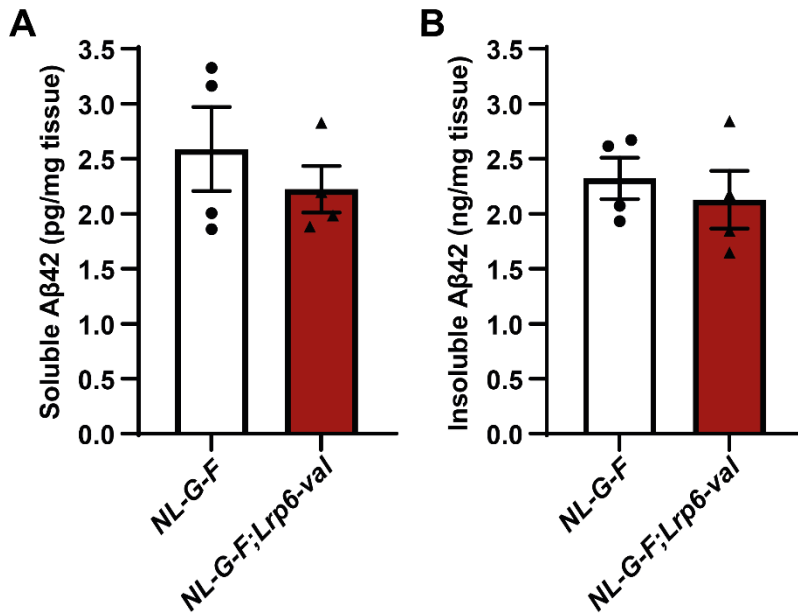

**Figure S10**

**Figure S10. Soluble and insoluble Aβ42 levels are unaffected in *NL-G-F;Lrp6-val* mice.** Quantification of soluble (A) and insoluble (B) Aβ42 by ELISA showed no differences. *NL-G-F* N = 4, *NL-G-F;Lrp6-val* N = 4. Unpaired T-test. Data are represented as mean ± SEM.



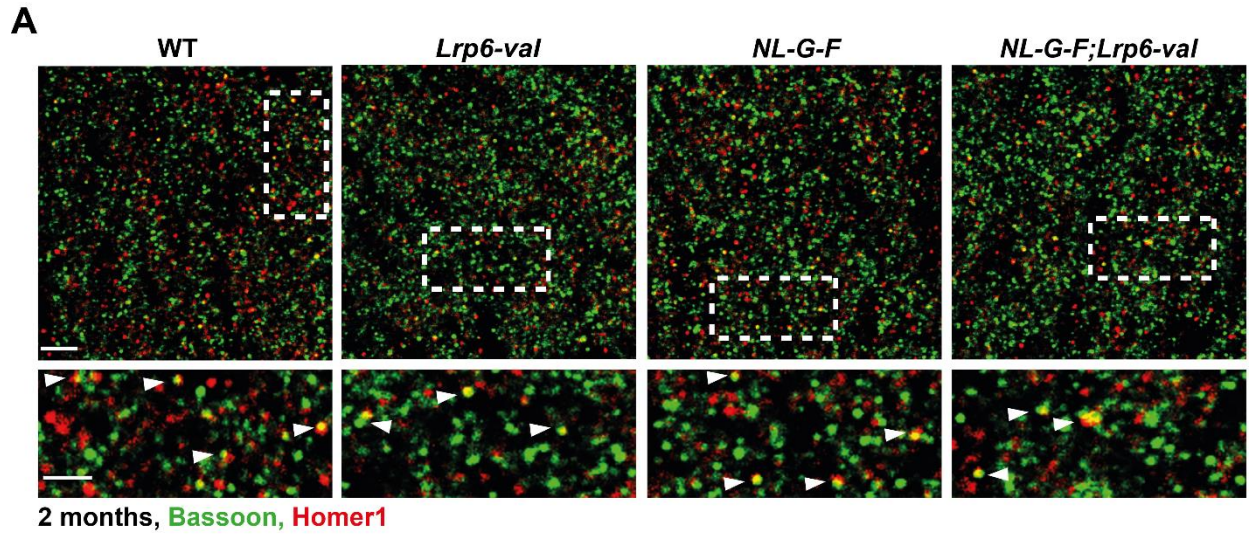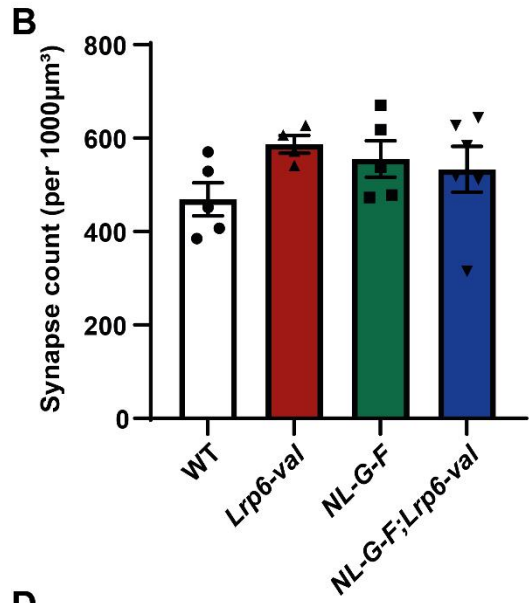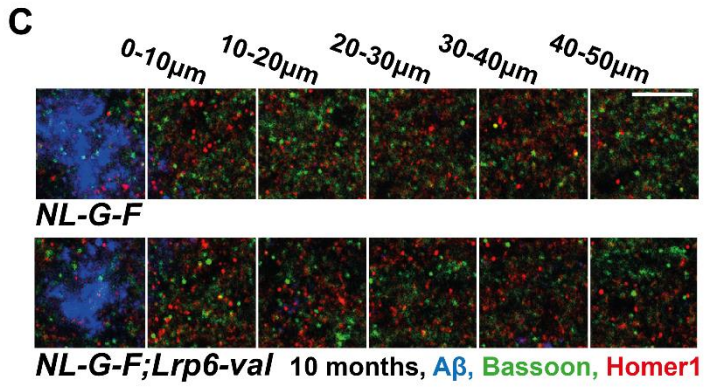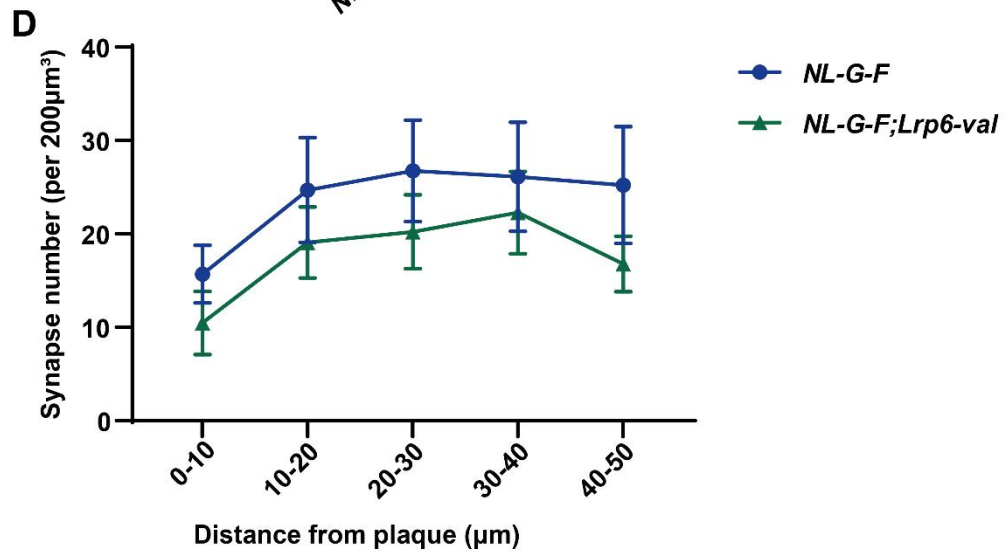

Figure S11

**Figure S11. *Lrp6-val* does not affect synapse number in *NL-G-F* mice at 2 months or 10 months.** **A)** Confocal images of the CA1 SR of WT, *Lrp6-val*, *NL-G-F* and *NL-G-F;Lrp6-val* mice at 2 months showing Bassoon (green) and Homer1 (red) puncta. Scale bar = 3.8  $\mu\text{m}$ . Insets show higher magnification images of synapses. Scale bar = 2  $\mu\text{m}$  **B)** Quantification of Bassoon and Homer1 puncta and synapse number (co-localised puncta). No differences are detected between any of the different genotypes. WT N = 5, *Lrp6-val* N = 4, *NL-G-F* N = 5, *NL-G-F;Lrp6-val* N = 6. One-way-ANOVA with Tukey's post hoc test. **C)** Confocal images of synapses, co-localised Bassoon (green) and Homer1 (red) puncta, at increasing distances from the centre of an A $\beta$  plaque (blue) in *NL-G-F* and *NL-G-F;Lrp6-val* mice at 10 months. **D)** Quantification revealed no differences in synapse number. Scale bar = 5  $\mu\text{m}$ . *NL-G-F* N = 15 slices from 5 brains, *NL-G-F;Lrp6-val* N = 11 slices from 4 brains. Repeated measure Two-way-ANOVA with Bonferroni's post hoc test. Data are represented as mean  $\pm$  SEM.

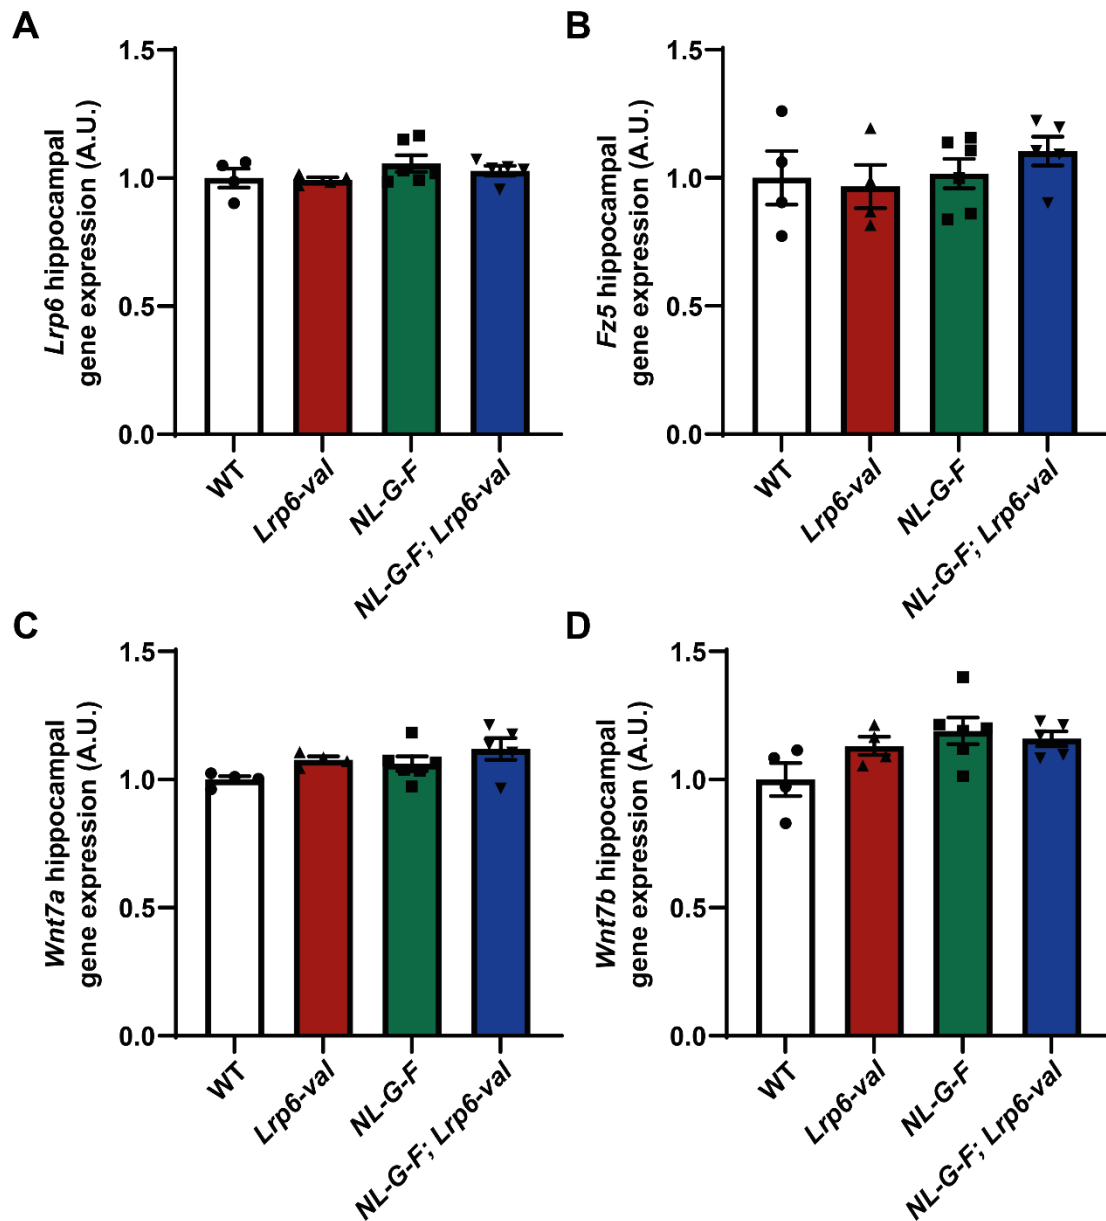

**Figure S12**

**Figure S12.** *Lrp6*, *Fz5*, *Wnt7a* and *Wnt7b* mRNA levels are unaffected in *Lrp6-val*, *NL-G-F* and *NL-G-F; Lrp6-val* mice. qPCR analyses of *Lrp6* (A), *Fz5* (B), *Wnt7a* (C) and *Wnt7b* (D) expression revealed no differences in the hippocampi of 7-9-month-old WT, *Lrp6-val*, *NL-G-F* and *NL-G-F; Lrp6-val* mice. WT N = 4, *Lrp6-val* N = 4, *NL-G-F* N = 6, *NL-G-F; Lrp6-val* N = 5. One-way-ANOVA with Tukey's post hoc test. Data are represented as mean  $\pm$  SEM.
